# Supplementary material for: Symbiotic flagellate protists as cryptic drivers of adaptation and invasiveness of the subterranean termite Reticulitermes grassei Clément
Source: PubMed Central journal article supplement (PMC6010709; doi:10.1002/ece3.3819), 2018-05-10
Supplement: ECE3-8-5242-s001.pdf [file ECE3-8-5242-s001.pdf]

**Supplementary table.** Average number of flagellate protists, per microliter of hindgut fluid, identified to morphotypes (n1 to n9, n13, n17 and n18) in each sampling point of Portugal geographical regions (AZ, BA, BE, EV, LE, PO, SA and SE).

|               |               | Code  | n1   | n2    | n3   | n4   | n5   | n6   | n7   | n8   | n9   | n13  | n17  | n18  |
|---------------|---------------|-------|------|-------|------|------|------|------|------|------|------|------|------|------|
| Azores (AZ)   | Horta         | hor1* | 939  | 2426  | 3061 | 1222 | 800  | 945  | 1120 | 2489 | 1396 | 835  | 800  | 995  |
|               | Horta         | hor2* | 1005 | 2810  | 2142 | 855  | 1113 | 1082 | 862  | 2400 | 1042 | 870  | 800  | 877  |
| Bragança (BA) | Mirandela     | mir*  | 965  | 9616  | 3008 | 949  | -    | 857  | 800  | 2232 | 1666 | -    | 800  | -    |
|               | Bornes        | bor   | 983  | 8312  | 1913 | 914  | 1013 | 867  | 974  | 4051 | 1505 | 859  | -    | 865  |
| Beja (BE)     | Mértola       | mer*  | 1303 | 8944  | 2338 | -    | -    | -    | 864  | 4808 | 1469 | -    | -    | -    |
|               | Moreanes      | mor   | 1183 | 9712  | 4162 | 960  | -    | 926  | 857  | 6476 | 2020 | 873  | 1029 | 933  |
| Évora (EV)    | Évora (city)  | evc*  | 996  | 3255  | 3875 | -    | -    | -    | 926  | 4767 | 2458 | -    | -    | 1000 |
|               | Évora (rural) | evf   | 1558 | 11800 | 3265 | 930  | -    | 1097 | 850  | 6861 | 1870 | 800  | 800  | -    |
| Leiria (LE)   | Alcobaça      | alc*  | 1004 | 9800  | 2858 | 939  | 1162 | 853  | 867  | 6424 | 1173 | 926  | -    | -    |
|               | Nazaré        | naz   | 1180 | 11472 | 2181 | 1150 | 1484 | 1013 | 1029 | 4702 | 1465 | 800  | -    | -    |
| Porto (PO)    | Porto         | por*  | 1061 | 7814  | 3693 | 925  | -    | 933  | 914  | 3564 | 1527 | 843  | -    | 980  |
|               | Baltar        | bal   | 1107 | 9544  | 2678 | 867  | 1247 | 840  | 1088 | 4718 | 1590 | 911  | -    | 992  |
| Santarém (SA) | Ourém         | our*  | 1114 | 8488  | 2920 | 894  | 1012 | 800  | 880  | 3767 | 1479 | 1000 | 910  | -    |
|               | Porto de Mós  | mos   | 1232 | 9504  | 4726 | 900  | 919  | 883  | 889  | 5424 | 1618 | 923  | -    | -    |
| Setúbal (SE)  | Almada        | alm*  | 995  | 10552 | 2763 | 933  | 912  | 800  | 800  | 5456 | 1125 | 873  | -    | -    |
|               | Sesimbra      | ses   | 1050 | 4727  | 3000 | 800  | 800  | 920  | 985  | 6862 | 1128 | 892  | 864  | 800  |

Note: Codes followed by an asterisk refer to urban sites, the remaining sampling points refer to rural sites
